# Supplementary material for: Syntheses, structures, and photoluminescence of 1-D lanthanide coordination polymers
Source: Royal Society of Chemistry journal article supplement (doi:10.1039/b910588c), 2009-01-01
Supplement: b910588c.pdf [file b910588c.pdf]

## Supplementary Material

### Syntheses, Structures, and Photoluminescence of 1-D Lanthanide Coordination Polymers

Xiaoping Yang, Richard A. Jones, Joseph H. Rivers and Wai-Kwok Wong

ESI HR-MS spectrum of the complex 2:

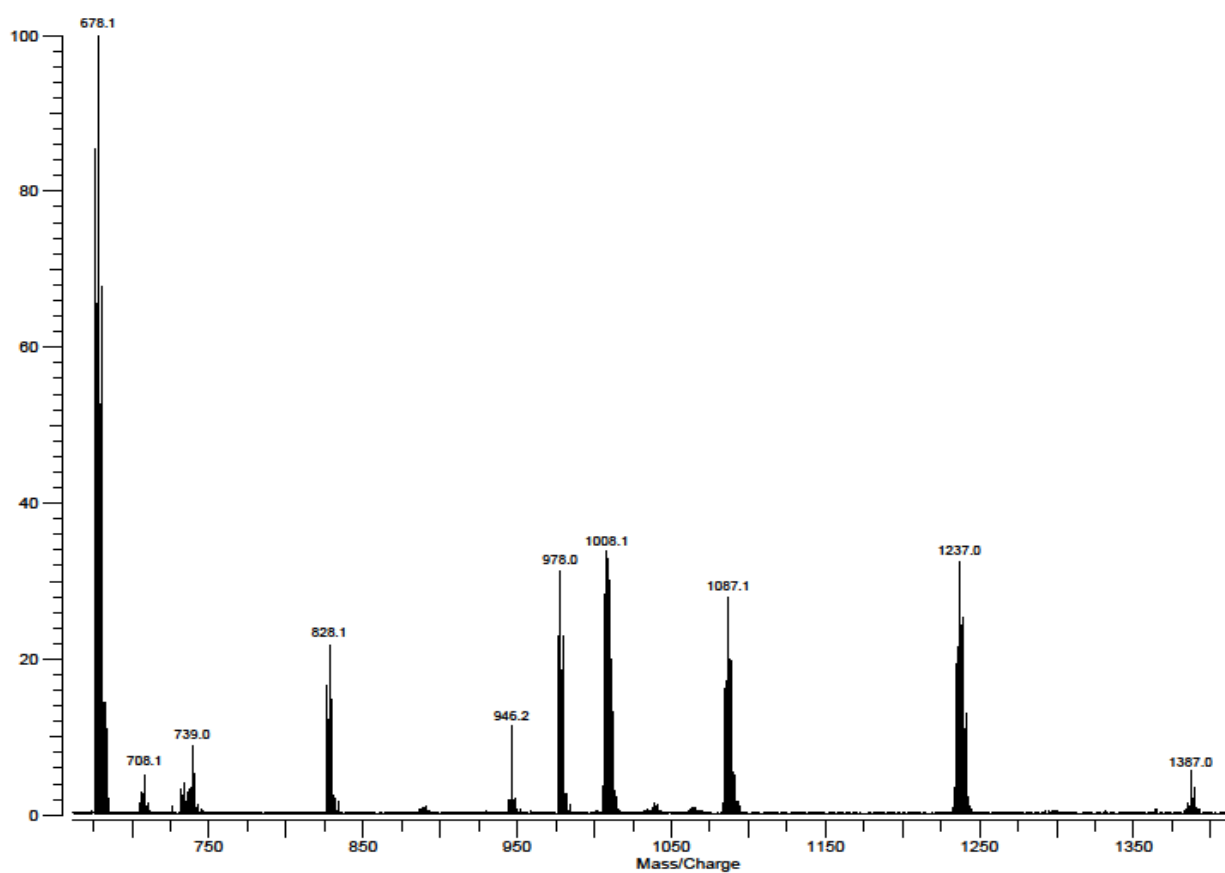

**Figure 1.** ESI HR-MS spectrum of 2

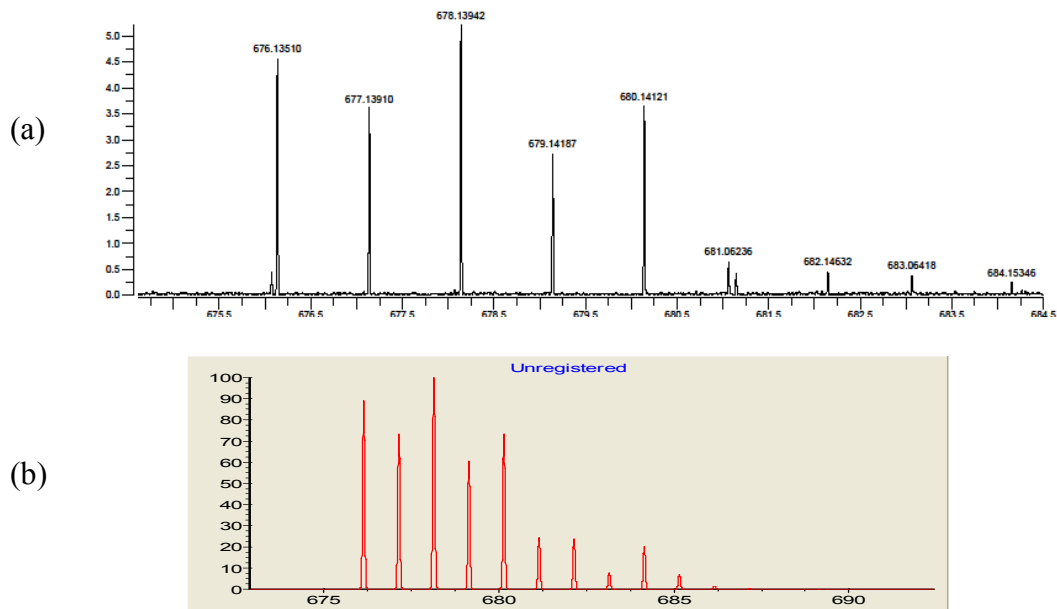

**Figure 2.** (a) Peaks for the species  $[\text{Nd}(\text{HL})_2]^+$  ( $\text{NdC}_{32}\text{H}_{30}\text{N}_4\text{O}_4$ ); (b) Theoretical isotope distribution pattern for  $[\text{NdC}_{32}\text{H}_{30}\text{N}_4\text{O}_4]^+$

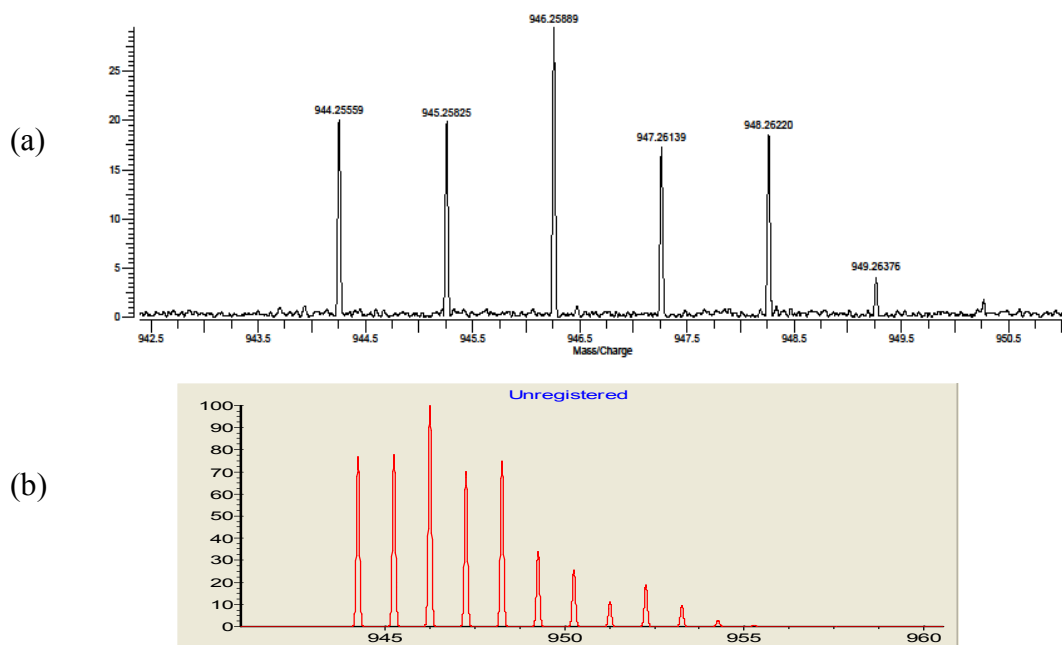

This journal is © The Royal Society of Chemistry 2010

**Figure 3.** (a) Peaks for the species  $[\text{Nd}_2\text{L}_2(\text{H}_2\text{L})_4]^{2+}$  ( $\text{Nd}_2\text{C}_96\text{H}_92\text{N}_{12}\text{O}_{12}$ ); (b) Theoretical isotope distribution pattern for  $[\text{Nd}_2\text{C}_96\text{H}_92\text{N}_{12}\text{O}_{12}]^{2+}$

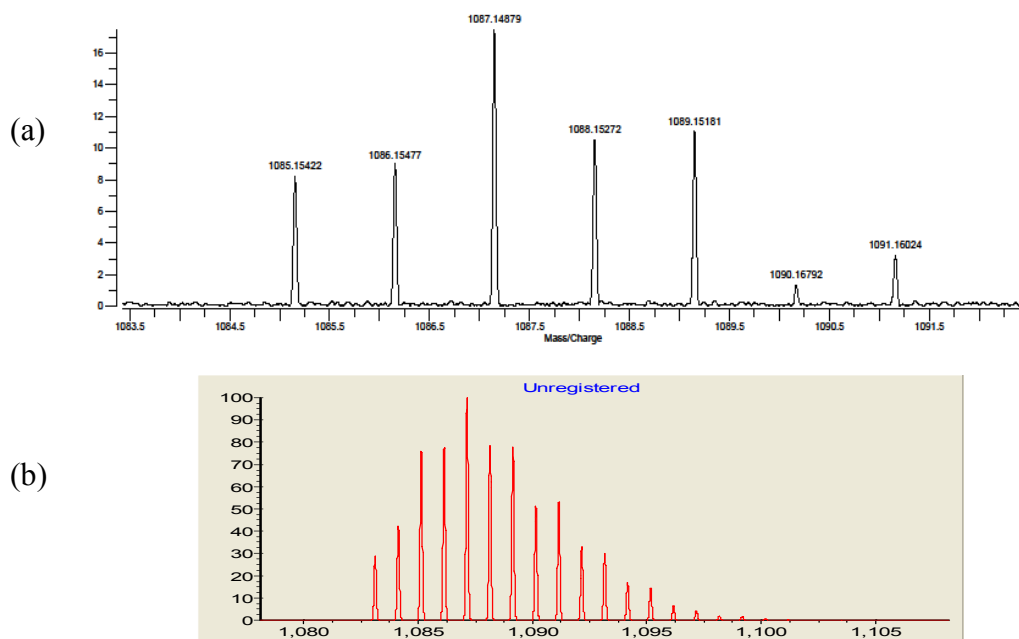

**Figure 4.** (a) Peaks for the species  $[\text{Nd}_2\text{L}_2(\text{HL})]^+$  ( $\text{Nd}_2\text{C}_{48}\text{H}_{43}\text{N}_6\text{O}_6$ ); (b) Theoretical isotope distribution pattern for  $[\text{Nd}_2\text{C}_{48}\text{H}_{43}\text{N}_6\text{O}_6]^+$

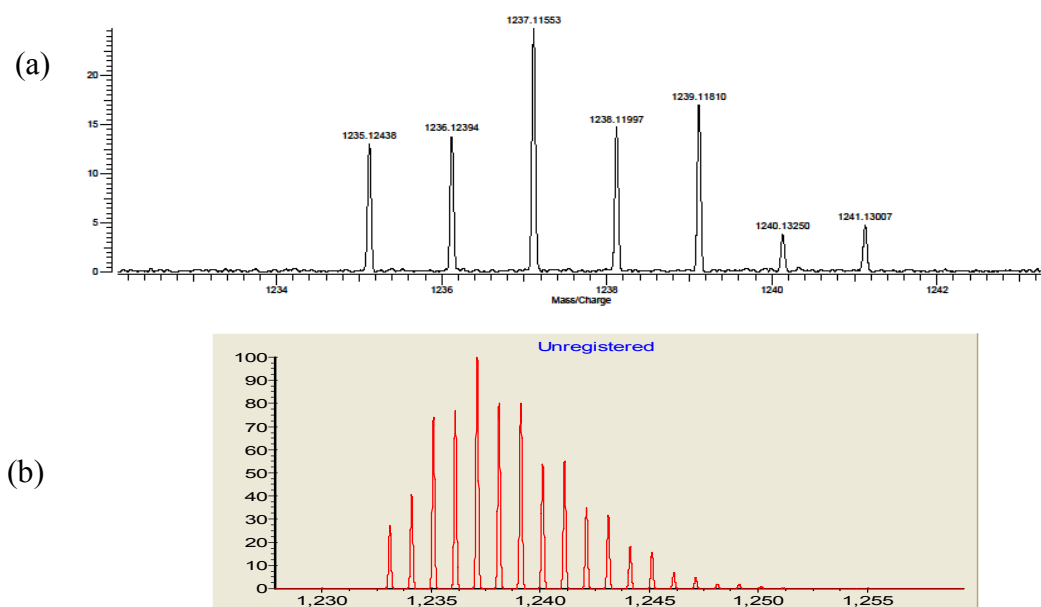

**Figure 5.** (a) Peaks for the species  $[\text{Nd}_2\text{L}_2(\text{H}_2\text{L})(\text{CF}_3\text{SO}_3)]^+$  ( $\text{Nd}_2\text{C}_{49}\text{H}_{44}\text{N}_6\text{O}_9\text{F}_3\text{S}$ ); (b) Theoretical isotope distribution pattern for  $[\text{Nd}_2\text{C}_{49}\text{H}_{44}\text{N}_6\text{O}_9\text{F}_3\text{S}]^+$
